# Supplementary material for: Ensenyar anglès en un context català
Source: Royal Society of Chemistry journal article supplement (doi:10.1039/d1cp03581a), 2007-01-01
Supplement: d1cp03581a1.pdf [file d1cp03581a1.pdf]

Supplementary Information

**Against the NEER Principle: The Third Type of  
Photochromism for GFP Chromophore Derivatives**

*Jun-Wei Liao, Robert Sung and Kuangsen Sung\**

Department of Chemistry, National Cheng Kung University, Tainan, Taiwan

| <u>Content</u>                                                                                                                                                                                           | <u>Page</u> |
|----------------------------------------------------------------------------------------------------------------------------------------------------------------------------------------------------------|-------------|
| 1. $^1\text{H}$ - and $^{13}\text{C}$ -NMR Spectra of <b>1</b>                                                                                                                                           | S2—S3       |
| 2. The $S_1$ and $S_0$ relaxed PESs of <i>s-E-1</i> along $\varphi$ -torsion relaxation                                                                                                                  | S3          |
| 3. The $S_1$ and $S_0$ relaxed PESs for ESIPT of <i>s-Z-1</i>                                                                                                                                            | S4          |
| 4. Electronic absorption of <i>s-E-1</i> in various solvents                                                                                                                                             | S4          |
| 5. X-ray crystallographic information of <i>s-E-1</i><br>(CCDC deposition number: 2068464)                                                                                                               | S5—S13      |
| 6. Cartesian coordinates and energies of the optimized structures for<br>$S_0$ and $S_1$ of <i>s-E-1</i> , <i>s-Z-1</i> , the <i>s-Z-1</i> tautomer and $S_0/S_1$ CI of <i>s-E-1</i><br>and <i>s-Z-1</i> | S14—S31     |

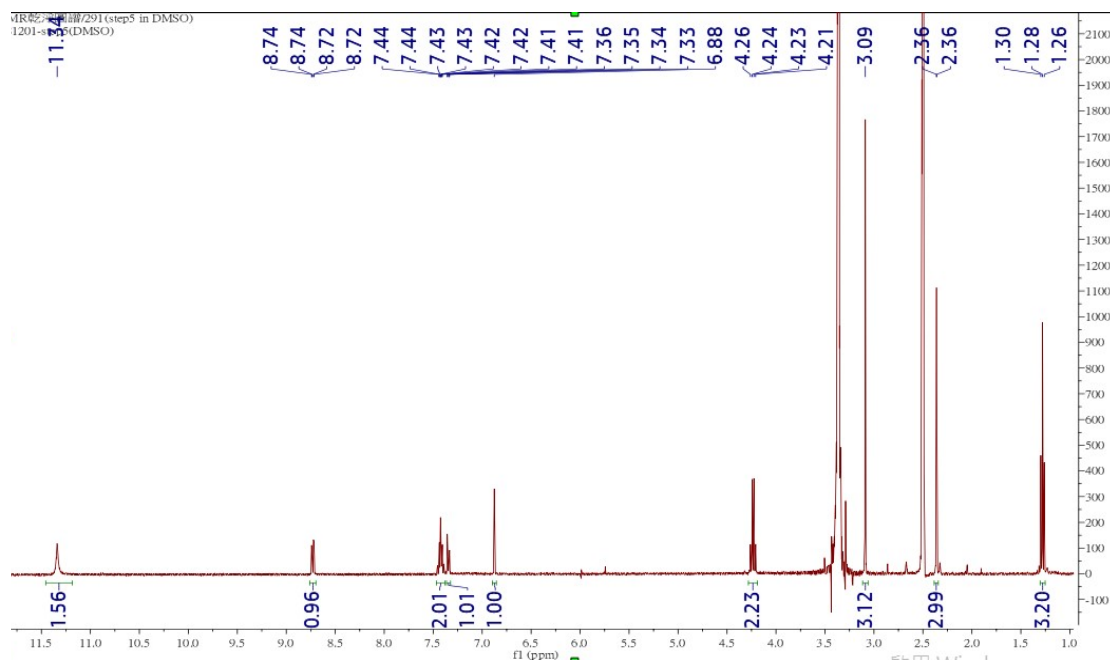

**Figure S1.**  $^1\text{H-NMR}$  spectrum (400 MHz) of **1** in  $d_6\text{-DMSO}$

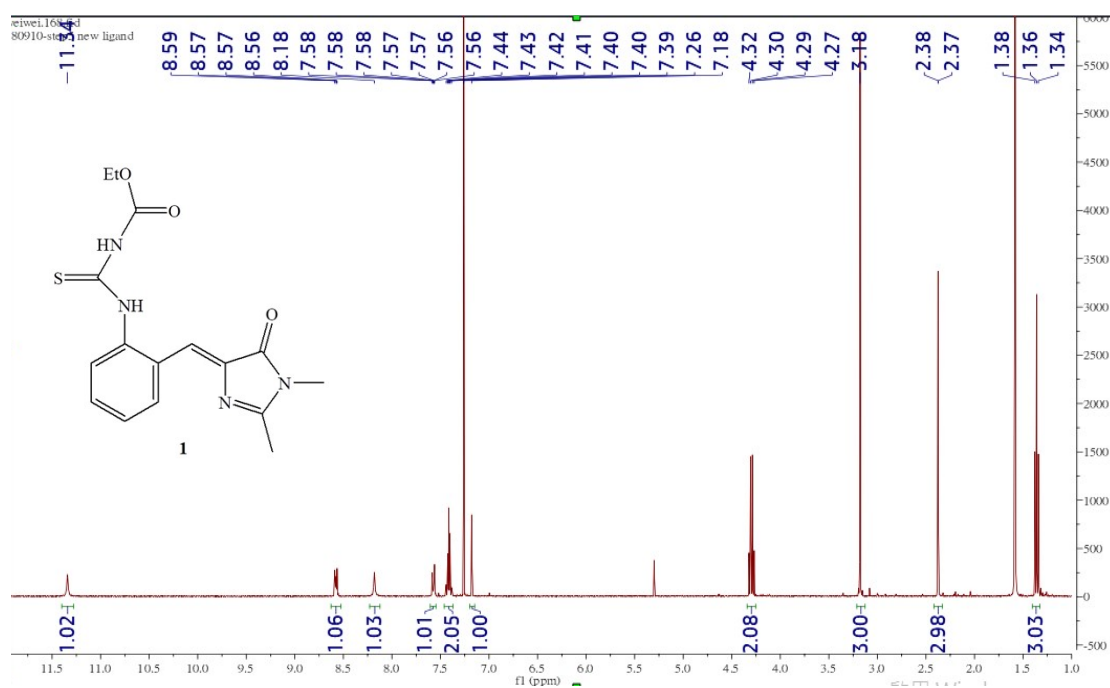

**Figure S2.**  $^1\text{H-NMR}$  spectrum (400 MHz) of **1** in  $\text{CDCl}_3$

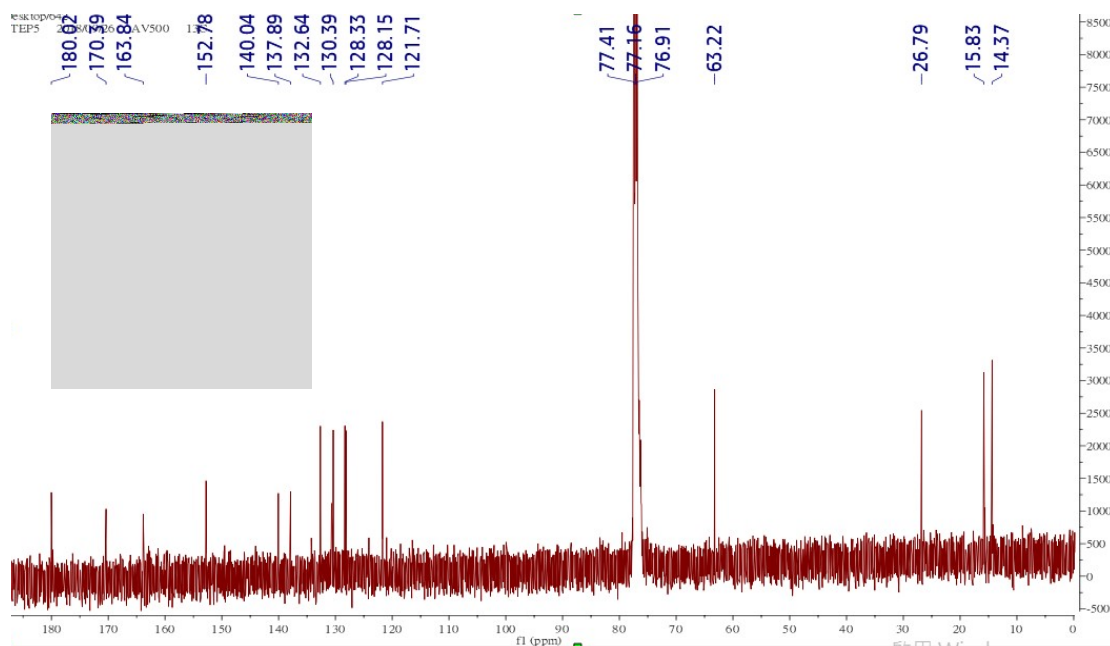

**Figure S3.**  $^{13}\text{C}$ -NMR spectrum (125 MHz) of **1** in  $\text{CDCl}_3$

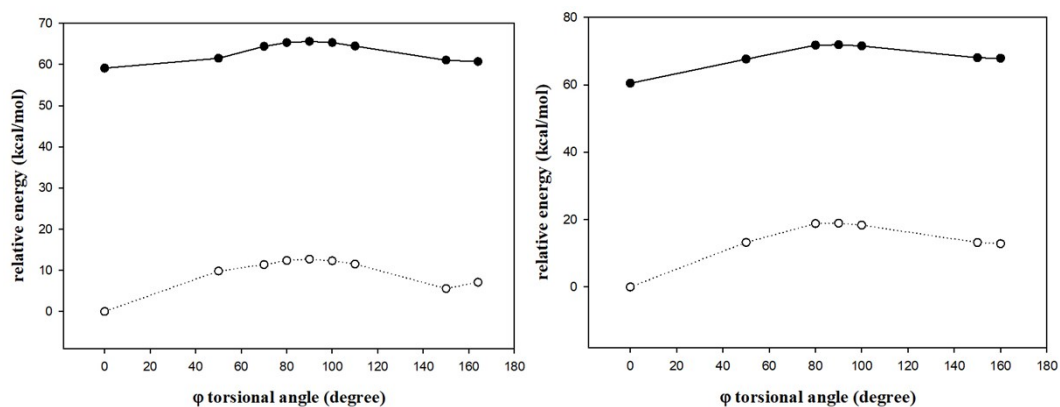

**Fig. S4.** The  $S_1$  (solid line) and Franck-Condon  $S_0$  (dashed line) relaxed PESs of *s-E-1* along  $\phi$ -torsion relaxation in gas phase (left) and DMSO (right) at the TD-CAM-B3LYP/6-31+G\* level

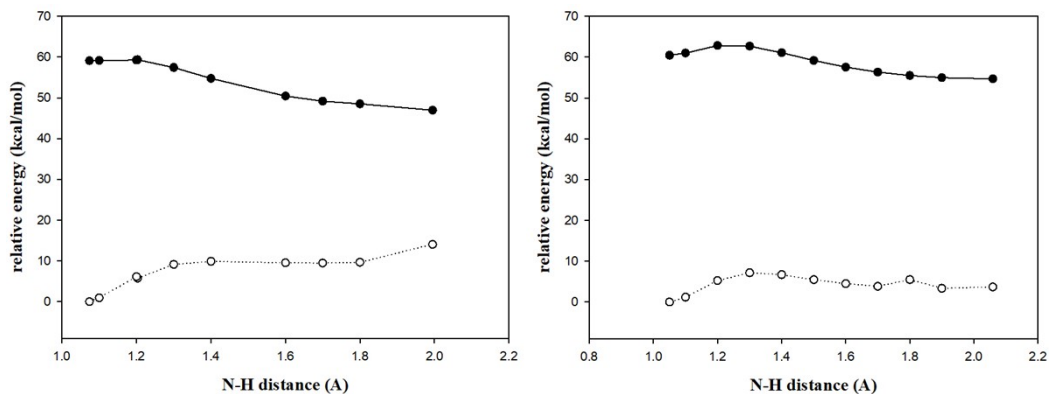

**Fig. S5.** The  $S_1$  (solid line) and Franck-Condon  $S_0$  (dashed line) relaxed PESs for ES IPT of *s-Z-1* in gas phase (left) and DMSO (right) at the TD-CAM-B3LYP/6-31+G\* level

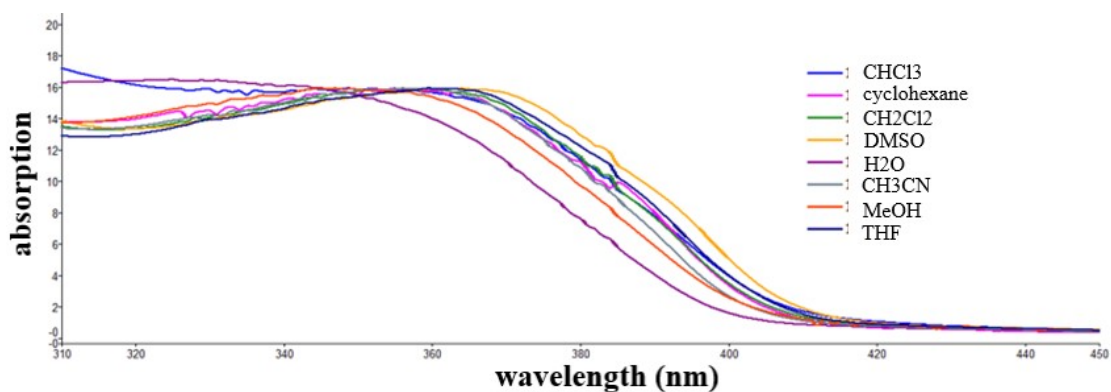

**Figure S6.** Normalized electronic absorption ( $\lambda_{abs}$ ) of *s-E-1* in solvents of  $\text{CHCl}_3$  (blue), cyclohexane (pink),  $\text{CH}_2\text{Cl}_2$  (green), DMSO (yellow),  $\text{H}_2\text{O}$  (violet),  $\text{CH}_3\text{CN}$  (pale green), MeOH (orange) and THF (dark blue).

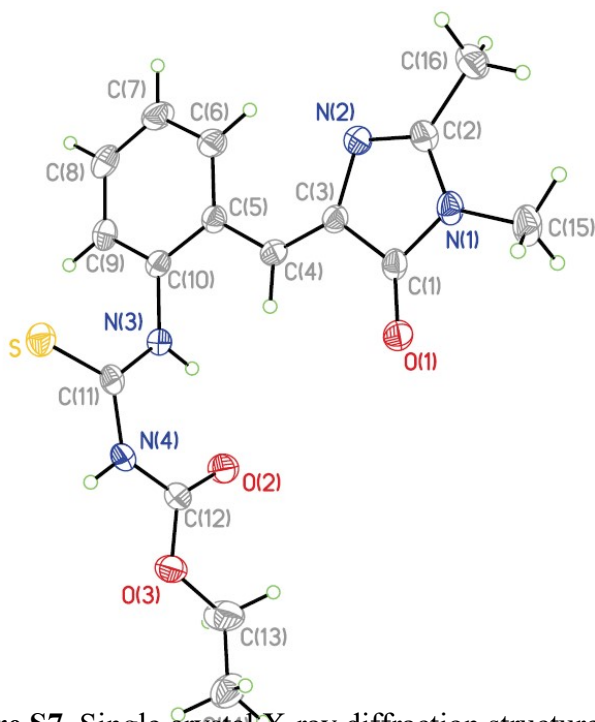

**Figure S7.** Single crystal X-ray diffraction structure of *s-E-1* with thermal ellipsoids at the 50% probability level

Table S1. Crystal data and structure refinement for *s-E-1*

|                                 |                                                                 |                    |
|---------------------------------|-----------------------------------------------------------------|--------------------|
| Identification code             | c16h18                                                          |                    |
| Empirical formula               | C <sub>16</sub> H <sub>18</sub> N <sub>4</sub> O <sub>3</sub> S |                    |
| Formula weight                  | 346.40                                                          |                    |
| Temperature                     | 150(2) K                                                        |                    |
| Wavelength                      | 0.71073 Å                                                       |                    |
| Crystal system                  | Monoclinic                                                      |                    |
| Space group                     | P2 <sub>1</sub> /c                                              |                    |
| Unit cell dimensions            | a = 10.7329(4) Å                                                | α = 90°.           |
|                                 | b = 15.3130(6) Å                                                | β = 111.0676(16)°. |
|                                 | c = 10.9752(4) Å                                                | γ = 90°.           |
| Volume                          | 1683.23(11) Å <sup>3</sup>                                      |                    |
| Z                               | 4                                                               |                    |
| Density (calculated)            | 1.367 Mg/m <sup>3</sup>                                         |                    |
| Absorption coefficient          | 0.215 mm <sup>-1</sup>                                          |                    |
| F(000)                          | 728                                                             |                    |
| Crystal size                    | 0.540 x 0.460 x 0.310 mm <sup>3</sup>                           |                    |
| Theta range for data collection | 3.322 to 27.155°.                                               |                    |
| Index ranges                    | -13 ≤ h ≤ 13, -19 ≤ k ≤ 19, -14 ≤ l ≤ 14                        |                    |
| Reflections collected           | 28452                                                           |                    |
| Independent reflections         | 3718 [R(int) = 0.0455]                                          |                    |
| Completeness to theta = 25.242° | 99.8 %                                                          |                    |

|                                   |                                             |
|-----------------------------------|---------------------------------------------|
| Absorption correction             | Semi-empirical from equivalents             |
| Max. and min. transmission        | 0.9281 and 0.8340                           |
| Refinement method                 | Full-matrix least-squares on F <sup>2</sup> |
| Data / restraints / parameters    | 3718 / 0 / 231                              |
| Goodness-of-fit on F <sup>2</sup> | 1.170                                       |
| Final R indices [I > 2σ(I)]       | R1 = 0.0501, wR2 = 0.1201                   |
| R indices (all data)              | R1 = 0.0720, wR2 = 0.1375                   |
| Extinction coefficient            | n/a                                         |
| Largest diff. peak and hole       | 0.535 and -0.349 e.Å <sup>-3</sup>          |

Table S2. Atomic coordinates ( $\times 10^4$ ) and equivalent isotropic displacement parameters ( $\text{\AA}^2 \times 10^3$ ) for *s-E-1*.  $U(\text{eq})$  is defined as one third of the trace of the orthogonalized  $U^{ij}$  tensor.

|       | x        | y        | z       | U(eq) |
|-------|----------|----------|---------|-------|
| S     | 5594(1)  | 812(1)   | 7938(1) | 31(1) |
| O(1)  | 1518(2)  | 563(1)   | 2291(2) | 32(1) |
| O(2)  | 4082(2)  | -1708(1) | 5646(2) | 36(1) |
| O(3)  | 6178(2)  | -1725(1) | 5619(2) | 35(1) |
| N(1)  | -342(2)  | 1430(1)  | 1932(2) | 26(1) |
| N(2)  | -425(2)  | 1529(1)  | 3953(2) | 27(1) |
| N(3)  | 3637(2)  | -348(1)  | 6934(2) | 24(1) |
| N(4)  | 5625(2)  | -639(1)  | 6649(2) | 24(1) |
| C(1)  | 732(2)   | 943(2)   | 2684(2) | 25(1) |
| C(2)  | -977(2)  | 1752(2)  | 2735(2) | 27(1) |
| C(3)  | 672(2)   | 1004(2)  | 4014(2) | 24(1) |
| C(4)  | 1569(2)  | 602(2)   | 5047(2) | 24(1) |
| C(5)  | 1675(2)  | 596(1)   | 6408(2) | 24(1) |
| C(6)  | 768(2)   | 1037(2)  | 6844(2) | 30(1) |
| C(7)  | 892(3)   | 1009(2)  | 8138(2) | 34(1) |
| C(8)  | 1923(2)  | 546(2)   | 9041(2) | 32(1) |
| C(9)  | 2842(2)  | 111(2)   | 8641(2) | 27(1) |
| C(10) | 2717(2)  | 138(1)   | 7339(2) | 23(1) |
| C(11) | 4893(2)  | -94(1)   | 7147(2) | 23(1) |
| C(12) | 5193(2)  | -1399(2) | 5941(2) | 27(1) |
| C(13) | 5880(3)  | -2528(2) | 4845(3) | 50(1) |
| C(14) | 6858(3)  | -2615(2) | 4178(3) | 42(1) |
| C(15) | -746(3)  | 1530(2)  | 516(2)  | 37(1) |
| C(16) | -2193(3) | 2305(2)  | 2197(3) | 39(1) |

Table S3. Bond lengths [ $\text{\AA}$ ] and angles [ $^\circ$ ] for *s-E-1*.

---

|              |          |
|--------------|----------|
| S-C(11)      | 1.666(2) |
| O(1)-C(1)    | 1.224(3) |
| O(2)-C(12)   | 1.213(3) |
| O(3)-C(12)   | 1.327(3) |
| O(3)-C(13)   | 1.463(3) |
| N(1)-C(1)    | 1.372(3) |
| N(1)-C(2)    | 1.385(3) |
| N(1)-C(15)   | 1.463(3) |
| N(2)-C(2)    | 1.298(3) |
| N(2)-C(3)    | 1.406(3) |
| N(3)-C(11)   | 1.340(3) |
| N(3)-C(10)   | 1.429(3) |
| N(3)-H(3A)   | 0.84(3)  |
| N(4)-C(12)   | 1.384(3) |
| N(4)-C(11)   | 1.385(3) |
| N(4)-H(4A)   | 0.80(3)  |
| C(1)-C(3)    | 1.488(3) |
| C(2)-C(16)   | 1.488(3) |
| C(3)-C(4)    | 1.344(3) |
| C(4)-C(5)    | 1.457(3) |
| C(4)-H(4B)   | 0.9500   |
| C(5)-C(10)   | 1.402(3) |
| C(5)-C(6)    | 1.402(3) |
| C(6)-C(7)    | 1.379(3) |
| C(6)-H(6A)   | 0.9500   |
| C(7)-C(8)    | 1.386(4) |
| C(7)-H(7A)   | 0.9500   |
| C(8)-C(9)    | 1.386(3) |
| C(8)-H(8A)   | 0.9500   |
| C(9)-C(10)   | 1.387(3) |
| C(9)-H(9A)   | 0.9500   |
| C(13)-C(14)  | 1.485(4) |
| C(13)-H(13A) | 0.9900   |
| C(13)-H(13B) | 0.9900   |
| C(14)-H(14A) | 0.9800   |
| C(14)-H(14B) | 0.9800   |



|                  |            |
|------------------|------------|
| C(14)-H(14C)     | 0.9800     |
| C(15)-H(15A)     | 0.9800     |
| C(15)-H(15B)     | 0.9800     |
| C(15)-H(15C)     | 0.9800     |
| C(16)-H(16A)     | 0.9800     |
| C(16)-H(16B)     | 0.9800     |
| C(16)-H(16C)     | 0.9800     |
|                  |            |
| C(12)-O(3)-C(13) | 116.25(18) |
| C(1)-N(1)-C(2)   | 108.06(17) |
| C(1)-N(1)-C(15)  | 124.05(19) |
| C(2)-N(1)-C(15)  | 127.8(2)   |
| C(2)-N(2)-C(3)   | 105.37(18) |
| C(11)-N(3)-C(10) | 123.97(19) |
| C(11)-N(3)-H(3A) | 115.0(18)  |
| C(10)-N(3)-H(3A) | 120.6(19)  |
| C(12)-N(4)-C(11) | 127.24(19) |
| C(12)-N(4)-H(4A) | 116.9(18)  |
| C(11)-N(4)-H(4A) | 115.6(18)  |
| O(1)-C(1)-N(1)   | 125.6(2)   |
| O(1)-C(1)-C(3)   | 130.9(2)   |
| N(1)-C(1)-C(3)   | 103.47(18) |
| N(2)-C(2)-N(1)   | 114.46(19) |
| N(2)-C(2)-C(16)  | 124.8(2)   |
| N(1)-C(2)-C(16)  | 120.8(2)   |
| C(4)-C(3)-N(2)   | 129.50(19) |
| C(4)-C(3)-C(1)   | 121.87(19) |
| N(2)-C(3)-C(1)   | 108.63(18) |
| C(3)-C(4)-C(5)   | 129.5(2)   |
| C(3)-C(4)-H(4B)  | 115.3      |
| C(5)-C(4)-H(4B)  | 115.3      |
| C(10)-C(5)-C(6)  | 117.52(19) |
| C(10)-C(5)-C(4)  | 119.89(19) |
| C(6)-C(5)-C(4)   | 122.6(2)   |
| C(7)-C(6)-C(5)   | 121.0(2)   |
| C(7)-C(6)-H(6A)  | 119.5      |
| C(5)-C(6)-H(6A)  | 119.5      |
| C(6)-C(7)-C(8)   | 120.6(2)   |

|                     |            |
|---------------------|------------|
| C(6)-C(7)-H(7A)     | 119.7      |
| C(8)-C(7)-H(7A)     | 119.7      |
| C(9)-C(8)-C(7)      | 119.7(2)   |
| C(9)-C(8)-H(8A)     | 120.2      |
| C(7)-C(8)-H(8A)     | 120.2      |
| C(10)-C(9)-C(8)     | 119.7(2)   |
| C(10)-C(9)-H(9A)    | 120.1      |
| C(8)-C(9)-H(9A)     | 120.1      |
| C(9)-C(10)-C(5)     | 121.5(2)   |
| C(9)-C(10)-N(3)     | 118.9(2)   |
| C(5)-C(10)-N(3)     | 119.57(18) |
| N(3)-C(11)-N(4)     | 115.7(2)   |
| N(3)-C(11)-S        | 124.74(17) |
| N(4)-C(11)-S        | 119.58(16) |
| O(2)-C(12)-O(3)     | 125.7(2)   |
| O(2)-C(12)-N(4)     | 125.2(2)   |
| O(3)-C(12)-N(4)     | 109.15(18) |
| O(3)-C(13)-C(14)    | 108.4(2)   |
| O(3)-C(13)-H(13A)   | 110.0      |
| C(14)-C(13)-H(13A)  | 110.0      |
| O(3)-C(13)-H(13B)   | 110.0      |
| C(14)-C(13)-H(13B)  | 110.0      |
| H(13A)-C(13)-H(13B) | 108.4      |
| C(13)-C(14)-H(14A)  | 109.5      |
| C(13)-C(14)-H(14B)  | 109.5      |
| H(14A)-C(14)-H(14B) | 109.5      |
| C(13)-C(14)-H(14C)  | 109.5      |
| H(14A)-C(14)-H(14C) | 109.5      |
| H(14B)-C(14)-H(14C) | 109.5      |
| N(1)-C(15)-H(15A)   | 109.5      |
| N(1)-C(15)-H(15B)   | 109.5      |
| H(15A)-C(15)-H(15B) | 109.5      |
| N(1)-C(15)-H(15C)   | 109.5      |
| H(15A)-C(15)-H(15C) | 109.5      |
| H(15B)-C(15)-H(15C) | 109.5      |
| C(2)-C(16)-H(16A)   | 109.5      |
| C(2)-C(16)-H(16B)   | 109.5      |
| H(16A)-C(16)-H(16B) | 109.5      |

|                     |       |
|---------------------|-------|
| C(2)-C(16)-H(16C)   | 109.5 |
| H(16A)-C(16)-H(16C) | 109.5 |
| H(16B)-C(16)-H(16C) | 109.5 |

---

Symmetry transformations used to generate equivalent atoms:

Table S4. Anisotropic displacement parameters ( $\text{\AA}^2 \times 10^3$ ) for *S-E-1*. The anisotropic displacement factor exponent takes the form:  $-2\pi^2 [ h^2 a^{*2} U^{11} + \dots + 2 h k a^* b^* U^{12} ]$

|       | U <sup>11</sup> | U <sup>22</sup> | U <sup>33</sup> | U <sup>23</sup> | U <sup>13</sup> | U <sup>12</sup> |
|-------|-----------------|-----------------|-----------------|-----------------|-----------------|-----------------|
| S     | 30(1)           | 29(1)           | 32(1)           | -3(1)           | 9(1)            | -5(1)           |
| O(1)  | 24(1)           | 51(1)           | 24(1)           | -4(1)           | 12(1)           | 1(1)            |
| O(2)  | 26(1)           | 37(1)           | 45(1)           | -12(1)          | 13(1)           | -6(1)           |
| O(3)  | 25(1)           | 32(1)           | 47(1)           | -12(1)          | 12(1)           | -1(1)           |
| N(1)  | 24(1)           | 37(1)           | 18(1)           | 2(1)            | 7(1)            | -2(1)           |
| N(2)  | 27(1)           | 30(1)           | 23(1)           | 0(1)            | 9(1)            | 3(1)            |
| N(3)  | 23(1)           | 25(1)           | 22(1)           | -2(1)           | 6(1)            | 0(1)            |
| N(4)  | 18(1)           | 28(1)           | 25(1)           | 0(1)            | 5(1)            | 0(1)            |
| C(1)  | 20(1)           | 34(1)           | 20(1)           | -2(1)           | 6(1)            | -5(1)           |
| C(2)  | 23(1)           | 29(1)           | 26(1)           | 1(1)            | 7(1)            | -1(1)           |
| C(3)  | 22(1)           | 29(1)           | 20(1)           | -3(1)           | 8(1)            | -2(1)           |
| C(4)  | 24(1)           | 30(1)           | 21(1)           | -2(1)           | 10(1)           | 2(1)            |
| C(5)  | 24(1)           | 26(1)           | 20(1)           | -1(1)           | 8(1)            | -2(1)           |
| C(6)  | 32(1)           | 35(1)           | 25(1)           | 0(1)            | 12(1)           | 5(1)            |
| C(7)  | 40(1)           | 39(1)           | 28(1)           | -3(1)           | 20(1)           | 4(1)            |
| C(8)  | 42(1)           | 34(1)           | 21(1)           | -3(1)           | 14(1)           | -6(1)           |
| C(9)  | 31(1)           | 27(1)           | 20(1)           | 1(1)            | 7(1)            | -4(1)           |
| C(10) | 25(1)           | 24(1)           | 21(1)           | -3(1)           | 9(1)            | -3(1)           |
| C(11) | 24(1)           | 26(1)           | 15(1)           | 6(1)            | 3(1)            | 2(1)            |
| C(12) | 24(1)           | 28(1)           | 26(1)           | 1(1)            | 6(1)            | 4(1)            |
| C(13) | 36(1)           | 35(2)           | 80(2)           | -25(1)          | 24(2)           | -7(1)           |
| C(14) | 55(2)           | 32(1)           | 36(1)           | -4(1)           | 15(1)           | 6(1)            |
| C(15) | 35(1)           | 57(2)           | 19(1)           | 8(1)            | 9(1)            | -2(1)           |
| C(16) | 34(1)           | 44(2)           | 36(1)           | 8(1)            | 7(1)            | 12(1)           |

Table S5. Hydrogen coordinates ( $\times 10^4$ ) and isotropic displacement parameters ( $\text{\AA}^2 \times 10^{-3}$ ) for *s-E-1*.

|        | x        | y        | z        | U(eq)   |
|--------|----------|----------|----------|---------|
| H(3A)  | 3380(30) | -795(19) | 6460(30) | 36(8)   |
| H(4A)  | 6400(30) | -523(16) | 6860(20) | 23(6)   |
| H(4B)  | 2231     | 273      | 4862     | 29      |
| H(6A)  | 58       | 1359     | 6238     | 36      |
| H(7A)  | 265      | 1310     | 8413     | 40      |
| H(8A)  | 1999     | 526      | 9930     | 38      |
| H(9A)  | 3555     | -204     | 9256     | 32      |
| H(13A) | 4962     | -2504    | 4190     | 60      |
| H(13B) | 5945     | -3038    | 5419     | 60      |
| H(14A) | 6672     | -3151    | 3654     | 62      |
| H(14B) | 6784     | -2110    | 3608     | 62      |
| H(14C) | 7764     | -2643    | 4833     | 62      |
| H(15A) | -1537    | 1905     | 193      | 190(30) |
| H(15B) | -15      | 1796     | 309      | 140(20) |
| H(15C) | -956     | 955      | 99       | 140(20) |
| H(16A) | -2415    | 2382     | 1256     | 220(30) |
| H(16B) | -2940    | 2020     | 2353     | 250(40) |
| H(16C) | -2025    | 2877     | 2627     | 280(40) |

Compound: *s-E-1* in gas phase

Method/basis set: CAM-B3LYP/6-31+G\*

Energy of the optimized structure: -1384.3866644 Hartree

# of imaginary frequencies: 0

Cartesian coordinate of the optimized structure:

|   |           |           |           |
|---|-----------|-----------|-----------|
| 6 | 2.021208  | 3.674006  | -0.922981 |
| 6 | 0.782805  | 3.079645  | -0.723798 |
| 6 | 0.700844  | 1.724161  | -0.429895 |
| 6 | 1.861016  | 0.932229  | -0.331385 |
| 6 | 3.103088  | 1.551490  | -0.554143 |
| 6 | 3.180838  | 2.905062  | -0.841124 |
| 1 | 2.080343  | 4.734558  | -1.147513 |
| 1 | -0.130731 | 3.660400  | -0.786470 |
| 1 | 4.001099  | 0.949948  | -0.490457 |
| 1 | 4.151260  | 3.364636  | -1.002071 |
| 7 | -0.583810 | 1.119083  | -0.289260 |
| 6 | 1.736615  | -0.476521 | 0.019401  |
| 1 | 0.744089  | -0.818468 | 0.299873  |
| 6 | 2.678839  | -1.437621 | 0.063106  |
| 7 | 4.052335  | -1.350569 | -0.234579 |
| 6 | 2.353681  | -2.837805 | 0.464500  |
| 7 | 3.594804  | -3.467809 | 0.367344  |
| 6 | 4.523118  | -2.533078 | -0.043506 |
| 8 | 1.306288  | -3.354948 | 0.796226  |
| 1 | 3.756299  | -4.443220 | 0.571473  |
| 1 | 5.562687  | -2.806015 | -0.186592 |
| 6 | -1.435450 | 1.349663  | 0.724070  |
| 1 | -0.899599 | 0.467217  | -1.008899 |
| 7 | -2.650199 | 0.664610  | 0.639831  |
| 6 | -3.076510 | -0.213803 | -0.327849 |
| 8 | -2.447939 | -0.530287 | -1.323318 |
| 8 | -4.289867 | -0.673853 | -0.021022 |
| 6 | -4.863013 | -1.627928 | -0.943864 |
| 1 | -4.929090 | -1.156976 | -1.927748 |
| 1 | -4.186264 | -2.482695 | -1.017185 |
| 6 | -6.218901 | -2.015714 | -0.402199 |
| 1 | -6.874692 | -1.143861 | -0.324912 |
| 1 | -6.687085 | -2.740402 | -1.075479 |

|    |           |           |          |
|----|-----------|-----------|----------|
| 1  | -6.129432 | -2.473013 | 0.587162 |
| 1  | -3.273132 | 0.829984  | 1.420621 |
| 16 | -1.169662 | 2.333167  | 2.036735 |

Compound: *s-E-1* in DMSO

Method/basis set: CAM-B3LYP/6-31+G\*; SCRF(PCM, solvent=DMSO)

Energy of the optimized structure: -1384.4110014 Hartree

# of imaginary frequencies: 0

Cartesian coordinate of the optimized structure:

|   |           |           |           |
|---|-----------|-----------|-----------|
| 6 | 1.842600  | 3.777257  | -0.812711 |
| 6 | 0.635739  | 3.112769  | -0.625210 |
| 6 | 0.623834  | 1.742452  | -0.401189 |
| 6 | 1.818287  | 0.996869  | -0.371191 |
| 6 | 3.025346  | 1.689370  | -0.564591 |
| 6 | 3.036886  | 3.060484  | -0.779804 |
| 1 | 1.848573  | 4.848634  | -0.985944 |
| 1 | -0.305834 | 3.651497  | -0.648050 |
| 1 | 3.953230  | 1.132224  | -0.544041 |
| 1 | 3.982834  | 3.572289  | -0.926592 |
| 7 | -0.641810 | 1.089260  | -0.259529 |
| 6 | 1.757561  | -0.441425 | -0.141120 |
| 1 | 0.765812  | -0.859393 | 0.005082  |
| 6 | 2.752937  | -1.346726 | -0.081861 |
| 7 | 4.140804  | -1.160960 | -0.227025 |
| 6 | 2.485181  | -2.794234 | 0.167247  |
| 7 | 3.753797  | -3.343125 | 0.148037  |
| 6 | 4.661819  | -2.333201 | -0.086086 |
| 8 | 1.433408  | -3.389731 | 0.347515  |
| 1 | 3.969617  | -4.322241 | 0.282542  |
| 1 | 5.722415  | -2.547162 | -0.141008 |
| 6 | -1.310323 | 0.975600  | 0.890161  |
| 1 | -1.104641 | 0.728491  | -1.096281 |
| 7 | -2.550518 | 0.363201  | 0.818785  |
| 6 | -3.195258 | -0.134448 | -0.296320 |
| 8 | -2.746784 | -0.107522 | -1.431396 |
| 8 | -4.368059 | -0.643514 | 0.049760  |
| 6 | -5.174649 | -1.213352 | -1.015013 |
| 1 | -5.372999 | -0.427366 | -1.746669 |

|    |           |           |           |
|----|-----------|-----------|-----------|
| 1  | -4.593253 | -2.003840 | -1.493968 |
| 6  | -6.441435 | -1.739008 | -0.384575 |
| 1  | -7.001570 | -0.935221 | 0.101331  |
| 1  | -7.073381 | -2.177319 | -1.162545 |
| 1  | -6.219750 | -2.513195 | 0.355280  |
| 1  | -3.038138 | 0.276379  | 1.702542  |
| 16 | -0.756781 | 1.496830  | 2.388937  |

Compound: *s*-Z-1 in gas phase

Method/basis set: CAM-B3LYP/6-31+G\*

Energy of the optimized structure: -1384.38403475 Hartree

# of imaginary frequencies: 0

Cartesian coordinate of the optimized structure:

|   |           |           |           |
|---|-----------|-----------|-----------|
| 6 | 3.445654  | -2.580829 | -1.178198 |
| 6 | 2.099007  | -2.303881 | -0.996924 |
| 6 | 1.684817  | -1.097004 | -0.439454 |
| 6 | 2.636059  | -0.130686 | -0.070034 |
| 6 | 3.994767  | -0.446145 | -0.229469 |
| 6 | 4.401995  | -1.648476 | -0.784055 |
| 1 | 3.747679  | -3.528616 | -1.612689 |
| 1 | 1.345398  | -3.034814 | -1.267678 |
| 1 | 4.736886  | 0.284826  | 0.079146  |
| 1 | 5.459818  | -1.859460 | -0.905786 |
| 7 | 0.288771  | -0.891510 | -0.235782 |
| 6 | 2.329173  | 1.190965  | 0.483335  |
| 1 | 3.006081  | 1.565204  | 1.249160  |
| 6 | 1.364831  | 2.040997  | 0.099210  |
| 7 | 0.421737  | 1.846637  | -0.925947 |
| 6 | 1.176275  | 3.401065  | 0.684639  |
| 7 | 0.105284  | 3.894379  | -0.064299 |
| 6 | -0.272615 | 2.927810  | -0.974455 |
| 8 | 1.766943  | 3.982575  | 1.569861  |
| 1 | -0.297740 | 4.812316  | 0.055904  |
| 1 | -1.098284 | 3.088563  | -1.658041 |
| 6 | -0.436452 | -1.615063 | 0.630132  |
| 1 | -0.151988 | -0.118041 | -0.744197 |
| 7 | -1.809300 | -1.358583 | 0.652551  |
| 6 | -2.571689 | -0.576168 | -0.180898 |



|    |           |           |           |
|----|-----------|-----------|-----------|
| 8  | -2.156628 | 0.138587  | -1.070903 |
| 8  | -3.864930 | -0.716418 | 0.143091  |
| 6  | -4.803219 | 0.046145  | -0.642014 |
| 1  | -4.569446 | 1.107917  | -0.525370 |
| 1  | -4.670963 | -0.218613 | -1.694113 |
| 6  | -6.188093 | -0.289298 | -0.138617 |
| 1  | -6.295391 | -0.027554 | 0.917836  |
| 1  | -6.932733 | 0.272911  | -0.710730 |
| 1  | -6.398419 | -1.356196 | -0.254755 |
| 1  | -2.308843 | -1.911170 | 1.338184  |
| 16 | 0.141022  | -2.766767 | 1.689493  |

Compound: *s*-Z-1 in DMSO

Method/basis set: CAM-B3LYP/6-31+G\*; SCRF(PCM, solvent=DMSO)

Energy of the optimized structure: -1384.4084241 Hartree

# of imaginary frequencies: 0

Cartesian coordinate of the optimized structure:

|   |           |           |           |
|---|-----------|-----------|-----------|
| 6 | 3.443210  | -2.580234 | -1.219369 |
| 6 | 2.094568  | -2.312906 | -1.024356 |
| 6 | 1.684685  | -1.107820 | -0.460870 |
| 6 | 2.629326  | -0.132981 | -0.101604 |
| 6 | 3.988625  | -0.437472 | -0.274037 |
| 6 | 4.396059  | -1.639584 | -0.833800 |
| 1 | 3.748695  | -3.523503 | -1.660684 |
| 1 | 1.341389  | -3.045165 | -1.295272 |
| 1 | 4.730210  | 0.297155  | 0.025764  |
| 1 | 5.453627  | -1.842676 | -0.968532 |
| 7 | 0.287891  | -0.902946 | -0.246269 |
| 6 | 2.300110  | 1.181856  | 0.458769  |
| 1 | 2.961975  | 1.552581  | 1.238726  |
| 6 | 1.329227  | 2.021006  | 0.067066  |
| 7 | 0.409809  | 1.841059  | -0.983953 |
| 6 | 1.109341  | 3.367822  | 0.673913  |
| 7 | 0.064640  | 3.868698  | -0.081820 |
| 6 | -0.287142 | 2.925583  | -1.023380 |
| 8 | 1.680303  | 3.926682  | 1.596281  |
| 1 | -0.361315 | 4.778286  | 0.040106  |

|    |           |           |           |
|----|-----------|-----------|-----------|
| 1  | -1.091284 | 3.116251  | -1.723679 |
| 6  | -0.411560 | -1.514395 | 0.709554  |
| 1  | -0.180042 | -0.198089 | -0.823777 |
| 7  | -1.776346 | -1.280720 | 0.733073  |
| 6  | -2.563876 | -0.656126 | -0.215707 |
| 8  | -2.152681 | -0.125806 | -1.230305 |
| 8  | -3.838633 | -0.724494 | 0.154369  |
| 6  | -4.807948 | -0.107505 | -0.730221 |
| 1  | -4.548650 | 0.948164  | -0.835843 |
| 1  | -4.731485 | -0.588634 | -1.707685 |
| 6  | -6.169566 | -0.299514 | -0.106644 |
| 1  | -6.221890 | 0.177129  | 0.876269  |
| 1  | -6.927489 | 0.155958  | -0.750778 |
| 1  | -6.404777 | -1.361918 | 0.002989  |
| 1  | -2.265436 | -1.715498 | 1.506149  |
| 16 | 0.229516  | -2.518132 | 1.903149  |

Compound: *s-E-1* dimer in gas phase

Method/basis set: CAM-B3LYP/6-31+G\*

Energy of the optimized structure: -2768.7942539 Hartree

# of imaginary frequencies: 0

Cartesian coordinate of the optimized structure:

|   |          |           |           |
|---|----------|-----------|-----------|
| 6 | 5.565331 | 3.497377  | -0.214938 |
| 6 | 4.208723 | 3.329491  | -0.453828 |
| 6 | 3.675375 | 2.049953  | -0.562189 |
| 6 | 4.498519 | 0.913970  | -0.427685 |
| 6 | 5.874359 | 1.107860  | -0.211566 |
| 6 | 6.399185 | 2.384879  | -0.101073 |
| 1 | 5.975440 | 4.499051  | -0.128922 |
| 1 | 3.550816 | 4.184425  | -0.557008 |
| 1 | 6.514758 | 0.238688  | -0.125398 |
| 1 | 7.462445 | 2.516755  | 0.074459  |
| 7 | 2.306838 | 1.874174  | -0.902087 |
| 6 | 3.888011 | -0.406504 | -0.461069 |
| 1 | 2.804211 | -0.430518 | -0.396891 |
| 6 | 4.463196 | -1.622942 | -0.529817 |
| 7 | 5.826772 | -1.953690 | -0.650891 |
| 6 | 3.660759 | -2.874335 | -0.498968 |

|    |           |           |           |
|----|-----------|-----------|-----------|
| 7  | 4.633087  | -3.857270 | -0.623053 |
| 6  | 5.867002  | -3.238084 | -0.704239 |
| 8  | 2.461661  | -3.066732 | -0.388649 |
| 1  | 4.439795  | -4.848168 | -0.649418 |
| 1  | 6.776109  | -3.819730 | -0.805989 |
| 6  | 1.245259  | 2.267890  | -0.170592 |
| 1  | 2.085656  | 1.402290  | -1.782560 |
| 7  | 0.005219  | 1.979081  | -0.732512 |
| 6  | -0.239107 | 1.312060  | -1.913467 |
| 8  | 0.615998  | 0.904751  | -2.686213 |
| 8  | -1.546285 | 1.162012  | -2.106729 |
| 6  | -1.926129 | 0.428124  | -3.298217 |
| 1  | -1.460468 | 0.912631  | -4.159663 |
| 1  | -1.532344 | -0.586589 | -3.207294 |
| 6  | -3.433986 | 0.444891  | -3.378619 |
| 1  | -3.815741 | 1.469063  | -3.430657 |
| 1  | -3.751917 | -0.088832 | -4.279840 |
| 1  | -3.879366 | -0.054073 | -2.514405 |
| 1  | -0.811142 | 2.313316  | -0.211115 |
| 16 | 1.316341  | 3.016503  | 1.316466  |
| 8  | -2.461721 | 3.066785  | 0.388325  |
| 6  | -3.660800 | 2.874394  | 0.498858  |
| 6  | -4.463226 | 1.622998  | 0.529868  |
| 7  | -4.633116 | 3.857325  | 0.623064  |
| 6  | -3.888038 | 0.406566  | 0.461080  |
| 7  | -5.826785 | 1.953736  | 0.651145  |
| 6  | -5.867015 | 3.238131  | 0.704452  |
| 1  | -4.439831 | 4.848225  | 0.649366  |
| 6  | -4.498542 | -0.913909 | 0.427790  |
| 1  | -2.804247 | 0.430589  | 0.396731  |
| 1  | -6.776110 | 3.819772  | 0.806330  |
| 6  | -3.675380 | -2.049888 | 0.562218  |
| 6  | -5.874399 | -1.107801 | 0.211782  |
| 6  | -4.208733 | -3.329428 | 0.453885  |
| 7  | -2.306825 | -1.874102 | 0.902033  |
| 6  | -6.399230 | -2.384819 | 0.101323  |
| 1  | -6.514806 | -0.238629 | 0.125667  |
| 6  | -5.565361 | -3.497315 | 0.215107  |

|    |           |           |           |
|----|-----------|-----------|-----------|
| 1  | -3.550817 | -4.184361 | 0.557006  |
| 6  | -1.245276 | -2.267842 | 0.170506  |
| 1  | -2.085597 | -1.402244 | 1.782508  |
| 1  | -7.462504 | -2.516696 | -0.074122 |
| 1  | -5.975471 | -4.498990 | 0.129115  |
| 7  | -0.005217 | -1.979069 | 0.732403  |
| 16 | -1.316406 | -3.016414 | -1.316570 |
| 6  | 0.239150  | -1.312093 | 1.913373  |
| 1  | 0.811128  | -2.313303 | 0.210981  |
| 8  | -0.615931 | -0.904712 | 2.686107  |
| 8  | 1.546343  | -1.162145 | 2.106630  |
| 6  | 1.926269  | -0.428264 | 3.298099  |
| 1  | 1.532807  | 0.586561  | 3.207019  |
| 1  | 1.460355  | -0.912534 | 4.159539  |
| 6  | 3.434111  | -0.445488 | 3.378679  |
| 1  | 3.879754  | 0.053212  | 2.514448  |
| 1  | 3.752104  | 0.088258  | 4.279865  |
| 1  | 3.815538  | -1.469774 | 3.430904  |

Compound: *s-E-1* dimer in DMSO

Method/basis set: CAM-B3LYP/6-31+G\*; SCRF(PCM, solvent=DMSO)

Energy of the optimized structure: -1384.4084241 Hartree

# of imaginary frequencies: 0

Cartesian coordinate of the optimized structure:

|   |           |           |           |
|---|-----------|-----------|-----------|
| 6 | -5.371111 | 3.771089  | -0.429229 |
| 6 | -4.022044 | 3.618374  | -0.133579 |
| 6 | -3.523543 | 2.371465  | 0.222953  |
| 6 | -4.368829 | 1.248054  | 0.306145  |
| 6 | -5.731335 | 1.427553  | 0.009472  |
| 6 | -6.224176 | 2.670780  | -0.357981 |
| 1 | -5.755581 | 4.746817  | -0.708780 |
| 1 | -3.344133 | 4.464154  | -0.177056 |
| 1 | -6.394029 | 0.573988  | 0.071894  |
| 1 | -7.279402 | 2.784440  | -0.585410 |
| 7 | -2.143071 | 2.259728  | 0.575056  |
| 6 | -3.804548 | -0.041392 | 0.681502  |
| 1 | -2.724307 | -0.072727 | 0.789622  |
| 6 | -4.422619 | -1.214528 | 0.921581  |

|    |           |           |           |
|----|-----------|-----------|-----------|
| 7  | -5.796410 | -1.521182 | 0.892224  |
| 6  | -3.668119 | -2.440334 | 1.299288  |
| 7  | -4.665309 | -3.373399 | 1.471248  |
| 6  | -5.878713 | -2.766984 | 1.214821  |
| 8  | -2.464493 | -2.629744 | 1.443298  |
| 1  | -4.521968 | -4.339597 | 1.735344  |
| 1  | -6.802445 | -3.327479 | 1.291155  |
| 6  | -1.128977 | 2.254260  | -0.297102 |
| 1  | -1.889022 | 2.240893  | 1.565327  |
| 7  | 0.144209  | 2.230461  | 0.240743  |
| 6  | 0.488296  | 2.210609  | 1.576620  |
| 8  | -0.303318 | 2.189090  | 2.508580  |
| 8  | 1.807131  | 2.216667  | 1.708427  |
| 6  | 2.327891  | 2.183914  | 3.061944  |
| 1  | 1.914430  | 3.034815  | 3.607419  |
| 1  | 1.984454  | 1.261106  | 3.534592  |
| 6  | 3.833290  | 2.247971  | 2.965481  |
| 1  | 4.156227  | 3.172158  | 2.477643  |
| 1  | 4.258615  | 2.224110  | 3.973207  |
| 1  | 4.228119  | 1.396752  | 2.404299  |
| 1  | 0.921038  | 2.265609  | -0.427677 |
| 16 | -1.307264 | 2.253962  | -1.971006 |
| 8  | 2.464578  | 2.629486  | -1.443423 |
| 6  | 3.668161  | 2.440280  | -1.298757 |
| 6  | 4.422633  | 1.214501  | -0.920947 |
| 7  | 4.665289  | 3.373552  | -1.469905 |
| 6  | 3.804572  | 0.041256  | -0.681377 |
| 7  | 5.796367  | 1.521336  | -0.890821 |
| 6  | 5.878654  | 2.767242  | -1.213020 |
| 1  | 4.521937  | 4.339807  | -1.733785 |
| 6  | 4.368815  | -1.248229 | -0.306097 |
| 1  | 2.724376  | 0.072501  | -0.789966 |
| 1  | 6.802342  | 3.327894  | -1.288730 |
| 6  | 3.523565  | -2.371705 | -0.223346 |
| 6  | 5.731266  | -1.427730 | -0.009187 |
| 6  | 4.022069  | -3.618691 | 0.132897  |
| 7  | 2.143101  | -2.259941 | -0.575526 |
| 6  | 6.224105  | -2.671040 | 0.357997  |

|    |           |           |           |
|----|-----------|-----------|-----------|
| 1  | 6.393928  | -0.574114 | -0.071246 |
| 6  | 5.371097  | -3.771421 | 0.428735  |
| 1  | 3.344186  | -4.464511 | 0.176040  |
| 6  | 1.129018  | -2.254205 | 0.296641  |
| 1  | 1.889063  | -2.241544 | -1.565808 |
| 1  | 7.279292  | -2.784708 | 0.585604  |
| 1  | 5.755574  | -4.747210 | 0.708065  |
| 7  | -0.144184 | -2.230346 | -0.241161 |
| 16 | 1.307353  | -2.253650 | 1.970542  |
| 6  | -0.488319 | -2.210724 | -1.577034 |
| 1  | -0.920980 | -2.265474 | 0.427292  |
| 8  | 0.303273  | -2.189546 | -2.509023 |
| 8  | -1.807153 | -2.216496 | -1.708799 |
| 6  | -2.327927 | -2.183852 | -3.062314 |
| 1  | -1.984001 | -1.261376 | -3.535252 |
| 1  | -1.914928 | -3.035143 | -3.607538 |
| 6  | -3.833356 | -2.247096 | -2.965809 |
| 1  | -4.227730 | -1.395540 | -2.404819 |
| 1  | -4.258685 | -2.223244 | -3.973533 |
| 1  | -4.156776 | -3.170997 | -2.477750 |

Compound: S<sub>1</sub> excited state of *s-E-1* in gas phase

Method/basis set: CAM-B3LYP-TD/6-31+G\*

Energy of the optimized structure: -1384.2642547 Hartree

# of imaginary frequencies: 0

Cartesian coordinate of the optimized structure:

|   |           |           |           |
|---|-----------|-----------|-----------|
| 6 | 1.820970  | 3.750168  | -0.708375 |
| 6 | 0.623377  | 3.066004  | -0.573774 |
| 6 | 0.618583  | 1.688236  | -0.315064 |
| 6 | 1.845477  | 0.988785  | -0.186509 |
| 6 | 3.039615  | 1.708690  | -0.364798 |
| 6 | 3.035888  | 3.071823  | -0.611574 |
| 1 | 1.804062  | 4.816609  | -0.913323 |
| 1 | -0.319850 | 3.582968  | -0.712594 |
| 1 | 3.976083  | 1.170753  | -0.286798 |
| 1 | 3.974136  | 3.604661  | -0.727678 |
| 7 | -0.593317 | 1.013637  | -0.212412 |
| 6 | 1.852037  | -0.417001 | 0.184372  |

|    |           |           |           |
|----|-----------|-----------|-----------|
| 1  | 0.950328  | -0.819951 | 0.642492  |
| 6  | 2.850240  | -1.320017 | 0.082482  |
| 7  | 4.134315  | -1.154004 | -0.470830 |
| 6  | 2.705844  | -2.719671 | 0.572314  |
| 7  | 3.947002  | -3.273451 | 0.251312  |
| 6  | 4.714639  | -2.296606 | -0.348566 |
| 8  | 1.783238  | -3.291460 | 1.117984  |
| 1  | 4.210064  | -4.228893 | 0.443215  |
| 1  | 5.724211  | -2.507277 | -0.683247 |
| 6  | -1.772261 | 1.604680  | 0.153080  |
| 1  | -0.628058 | 0.004691  | -0.346568 |
| 7  | -2.946208 | 0.859430  | -0.014347 |
| 6  | -3.036204 | -0.502646 | -0.134918 |
| 8  | -2.090277 | -1.271407 | -0.110962 |
| 8  | -4.312202 | -0.868784 | -0.320486 |
| 6  | -4.543993 | -2.284165 | -0.485994 |
| 1  | -3.978081 | -2.627421 | -1.355784 |
| 1  | -4.159739 | -2.802752 | 0.395814  |
| 6  | -6.032367 | -2.478495 | -0.660027 |
| 1  | -6.397834 | -1.943706 | -1.541465 |
| 1  | -6.249788 | -3.543365 | -0.788828 |
| 1  | -6.579579 | -2.119427 | 0.216317  |
| 1  | -3.818584 | 1.368363  | -0.082188 |
| 16 | -1.854816 | 2.763748  | 1.484774  |

Compound: S<sub>1</sub> excited state of *s-E-1* in DMSO

Method/basis set: CAM-B3LYP-TD/6-31+G\*; SCRF(PCM, solvent=DMSO)

Energy of the optimized structure: -1384.28244198 Hartree

# of imaginary frequencies: 0

Cartesian coordinate of the optimized structure:

|   |           |          |           |
|---|-----------|----------|-----------|
| 6 | 1.913231  | 3.761844 | -0.506583 |
| 6 | 0.704327  | 3.080406 | -0.549738 |
| 6 | 0.664207  | 1.689034 | -0.359837 |
| 6 | 1.869035  | 0.973274 | -0.134766 |
| 6 | 3.075536  | 1.691649 | -0.131676 |
| 6 | 3.105433  | 3.069012 | -0.301384 |
| 1 | 1.923576  | 4.836545 | -0.660260 |
| 1 | -0.207827 | 3.609878 | -0.802870 |

|    |           |           |           |
|----|-----------|-----------|-----------|
| 1  | 3.996215  | 1.146545  | 0.035833  |
| 1  | 4.052045  | 3.598636  | -0.275224 |
| 7  | -0.555986 | 1.034739  | -0.408977 |
| 6  | 1.827887  | -0.450140 | 0.158591  |
| 1  | 0.893118  | -0.850883 | 0.546338  |
| 6  | 2.808815  | -1.370771 | 0.052462  |
| 7  | 4.118885  | -1.212841 | -0.438518 |
| 6  | 2.612300  | -2.790077 | 0.455638  |
| 7  | 3.839573  | -3.358246 | 0.166963  |
| 6  | 4.662012  | -2.380230 | -0.350777 |
| 8  | 1.636856  | -3.358918 | 0.927625  |
| 1  | 4.080995  | -4.330203 | 0.308878  |
| 1  | 5.675914  | -2.613916 | -0.652386 |
| 6  | -1.734257 | 1.638558  | -0.043051 |
| 1  | -0.585350 | 0.023091  | -0.501501 |
| 7  | -2.918807 | 0.910819  | -0.206883 |
| 6  | -3.039079 | -0.450629 | -0.098753 |
| 8  | -2.104539 | -1.210900 | 0.115183  |
| 8  | -4.302343 | -0.828179 | -0.296601 |
| 6  | -4.569376 | -2.250948 | -0.262112 |
| 1  | -3.960486 | -2.732601 | -1.030566 |
| 1  | -4.266770 | -2.633197 | 0.715347  |
| 6  | -6.047339 | -2.437031 | -0.510540 |
| 1  | -6.334444 | -2.037952 | -1.487580 |
| 1  | -6.284622 | -3.504910 | -0.491907 |
| 1  | -6.640842 | -1.939440 | 0.261761  |
| 1  | -3.768957 | 1.425805  | -0.407023 |
| 16 | -1.807151 | 2.807598  | 1.261160  |

Compound: S<sub>1</sub> excited state of *s*-Z-1 in gas phase

Method/basis set: CAM-B3LYP-TD/6-31+G\*

Energy of the optimized structure: -1384.26685387 Hartree

# of imaginary frequencies: 0

Cartesian coordinate of the optimized structure:

|   |          |           |           |
|---|----------|-----------|-----------|
| 6 | 3.113815 | -2.968351 | -0.825348 |
| 6 | 1.832993 | -2.435769 | -0.823141 |
| 6 | 1.582038 | -1.109518 | -0.394851 |
| 6 | 2.665750 | -0.221303 | -0.088037 |



|    |           |           |           |
|----|-----------|-----------|-----------|
| 6  | 3.940578  | -0.828968 | -0.077251 |
| 6  | 4.173230  | -2.153913 | -0.421803 |
| 1  | 3.283619  | -3.981731 | -1.172825 |
| 1  | 1.021398  | -2.997440 | -1.273335 |
| 1  | 4.782973  | -0.208618 | 0.215640  |
| 1  | 5.188150  | -2.538608 | -0.408591 |
| 7  | 0.244356  | -0.752585 | -0.185570 |
| 6  | 2.606566  | 1.169097  | 0.238205  |
| 1  | 3.530487  | 1.601426  | 0.612019  |
| 6  | 1.583537  | 2.080869  | 0.090303  |
| 7  | 0.321993  | 1.845403  | -0.451736 |
| 6  | 1.703936  | 3.501369  | 0.412144  |
| 7  | 0.452864  | 4.006813  | 0.014484  |
| 6  | -0.309508 | 2.983039  | -0.478722 |
| 8  | 2.617210  | 4.165685  | 0.892222  |
| 1  | 0.197339  | 4.980607  | 0.083637  |
| 1  | -1.318845 | 3.115004  | -0.843917 |
| 6  | -0.579632 | -1.591001 | 0.412063  |
| 1  | -0.021006 | 0.264837  | -0.406696 |
| 7  | -1.925210 | -1.313275 | 0.539086  |
| 6  | -2.681214 | -0.396583 | -0.174881 |
| 8  | -2.256575 | 0.381544  | -0.994743 |
| 8  | -3.962175 | -0.522409 | 0.195918  |
| 6  | -4.898220 | 0.363732  | -0.456138 |
| 1  | -4.604116 | 1.393639  | -0.237994 |
| 1  | -4.824863 | 0.207968  | -1.535299 |
| 6  | -6.273692 | 0.038579  | 0.077398  |
| 1  | -6.320995 | 0.189794  | 1.159512  |
| 1  | -7.012569 | 0.693755  | -0.394169 |
| 1  | -6.544515 | -0.998135 | -0.141731 |
| 1  | -2.454686 | -1.945704 | 1.125725  |
| 16 | -0.031821 | -3.066720 | 1.132334  |

Compound: S<sub>1</sub> excited state of *s*-Z-1 in DMSO

Method/basis set: CAM-B3LYP-TD/6-31+G\*; SCRF(PCM, solvent=DMSO)

Energy of the optimized structure: -1384.29423559 Hartree

# of imaginary frequencies: 0

Cartesian coordinate of the optimized structure:

|    |           |           |           |
|----|-----------|-----------|-----------|
| 6  | 3.122198  | -2.941570 | -0.950107 |
| 6  | 1.866248  | -2.562298 | -0.547023 |
| 6  | 1.563355  | -1.221333 | -0.235844 |
| 6  | 2.589589  | -0.188012 | -0.389353 |
| 6  | 3.888341  | -0.661733 | -0.779862 |
| 6  | 4.155110  | -1.973722 | -1.046454 |
| 1  | 3.317842  | -3.976853 | -1.208634 |
| 1  | 1.076101  | -3.298127 | -0.486317 |
| 1  | 4.677045  | 0.077393  | -0.877453 |
| 1  | 5.151882  | -2.274413 | -1.352248 |
| 7  | 0.303347  | -0.878405 | 0.182474  |
| 6  | 2.491454  | 1.197322  | -0.176240 |
| 1  | 3.433419  | 1.728916  | -0.280612 |
| 6  | 1.426338  | 2.076663  | 0.124914  |
| 7  | 0.095301  | 1.796030  | 0.231522  |
| 6  | 1.629613  | 3.503905  | 0.347380  |
| 7  | 0.330410  | 3.970460  | 0.588142  |
| 6  | -0.529036 | 2.932335  | 0.506548  |
| 8  | 2.655431  | 4.196030  | 0.347385  |
| 1  | 0.089621  | 4.933744  | 0.786331  |
| 1  | -1.596556 | 3.035398  | 0.643725  |
| 6  | -0.607958 | -1.636311 | 0.852696  |
| 1  | 0.019889  | 0.126371  | 0.069746  |
| 7  | -1.905547 | -1.158629 | 0.758172  |
| 6  | -2.494423 | -0.561113 | -0.349032 |
| 8  | -1.928609 | -0.285910 | -1.385772 |
| 8  | -3.783848 | -0.350942 | -0.090783 |
| 6  | -4.567577 | 0.247619  | -1.152998 |
| 1  | -4.130296 | 1.219599  | -1.392148 |
| 1  | -4.496723 | -0.395223 | -2.033110 |
| 6  | -5.986257 | 0.370329  | -0.650939 |
| 1  | -6.035131 | 1.006968  | 0.237033  |
| 1  | -6.606384 | 0.820774  | -1.431583 |
| 1  | -6.401933 | -0.610928 | -0.405014 |
| 1  | -2.546976 | -1.514341 | 1.457686  |
| 16 | -0.283884 | -2.934460 | 1.853854  |

Compound: S<sub>1</sub> excited state of the *s*-Z-1 tautomer in gas phase

Method/basis set: CAM-B3LYP-TD/6-31+G\*

Energy of the optimized structure: -1384.28616952 Hartree

# of imaginary frequencies: 0

Cartesian coordinate of the optimized structure:

|   |           |           |           |
|---|-----------|-----------|-----------|
| 6 | 3.557560  | -2.680646 | -1.134581 |
| 6 | 2.196744  | -2.401068 | -1.095990 |
| 6 | 1.726392  | -1.212637 | -0.546358 |
| 6 | 2.620822  | -0.207140 | -0.115946 |
| 6 | 3.992990  | -0.536939 | -0.137276 |
| 6 | 4.458717  | -1.744176 | -0.629378 |
| 1 | 3.907497  | -3.623921 | -1.541921 |
| 1 | 1.472460  | -3.125300 | -1.456363 |
| 1 | 4.700260  | 0.204239  | 0.224889  |
| 1 | 5.525017  | -1.949426 | -0.634844 |
| 7 | 0.313264  | -1.039416 | -0.467658 |
| 6 | 2.261261  | 1.131798  | 0.304898  |
| 1 | 3.019068  | 1.669409  | 0.866763  |
| 6 | 1.180612  | 1.935118  | -0.010676 |
| 7 | 0.074638  | 1.682679  | -0.820102 |
| 6 | 1.060589  | 3.324973  | 0.398656  |
| 7 | -0.132954 | 3.755058  | -0.225400 |
| 6 | -0.700570 | 2.757450  | -0.932396 |
| 8 | 1.773571  | 4.037460  | 1.099837  |
| 1 | -0.481084 | 4.699181  | -0.140970 |
| 1 | -1.631659 | 2.795141  | -1.471683 |
| 6 | -0.277459 | -1.253069 | 0.633754  |
| 1 | -0.189906 | 0.759727  | -1.166392 |
| 7 | -1.661531 | -1.105634 | 0.755083  |
| 6 | -2.550556 | -0.653161 | -0.201168 |
| 8 | -2.279038 | -0.109489 | -1.247032 |
| 8 | -3.797832 | -0.887201 | 0.235460  |
| 6 | -4.867194 | -0.424573 | -0.615149 |
| 1 | -4.772920 | 0.658553  | -0.731155 |
| 1 | -4.748712 | -0.884428 | -1.599260 |
| 6 | -6.169283 | -0.814321 | 0.045300  |
| 1 | -6.263130 | -0.352375 | 1.032249  |
| 1 | -7.008107 | -0.479473 | -0.572676 |

|    |           |           |          |
|----|-----------|-----------|----------|
| 1  | -6.239603 | -1.899515 | 0.161283 |
| 1  | -2.080268 | -1.384293 | 1.631920 |
| 16 | 0.507488  | -1.737009 | 2.138527 |

Compound: S<sub>1</sub> excited state of the *s*-Z-1 tautomer in DMSO

Method/basis set: CAM-B3LYP-TD/6-31+G\*; SCRF(PCM, solvent=DMSO)

Energy of the optimized structure: -1384.3034491 Hartree

# of imaginary frequencies: 0

Cartesian coordinate of the optimized structure:

|   |           |           |           |
|---|-----------|-----------|-----------|
| 6 | 2.446436  | -2.891331 | -1.259463 |
| 6 | 1.410383  | -2.330373 | -0.546793 |
| 6 | 1.474949  | -0.998824 | -0.057029 |
| 6 | 2.621895  | -0.171375 | -0.397040 |
| 6 | 3.689115  | -0.820137 | -1.055299 |
| 6 | 3.612036  | -2.133755 | -1.485223 |
| 1 | 2.366976  | -3.904667 | -1.638191 |
| 1 | 0.510365  | -2.901302 | -0.353450 |
| 1 | 4.588130  | -0.246967 | -1.260681 |
| 1 | 4.449261  | -2.571462 | -2.019497 |
| 7 | 0.490441  | -0.471331 | 0.703091  |
| 6 | 2.805354  | 1.210113  | -0.092166 |
| 1 | 3.825397  | 1.565781  | -0.210631 |
| 6 | 1.936287  | 2.248422  | 0.224282  |
| 7 | 0.551171  | 2.279881  | 0.288717  |
| 6 | 2.371155  | 3.613384  | 0.455801  |
| 7 | 1.175793  | 4.323487  | 0.650011  |
| 6 | 0.117167  | 3.504100  | 0.543241  |
| 8 | 3.503746  | 4.110057  | 0.488055  |
| 1 | 1.128480  | 5.317171  | 0.838621  |
| 1 | -0.917616 | 3.789111  | 0.649961  |
| 6 | -0.241866 | -1.165463 | 1.564659  |
| 1 | -0.058724 | 1.456268  | 0.232452  |
| 7 | -1.519342 | -0.687181 | 1.847486  |
| 6 | -2.269054 | 0.225383  | 1.143968  |
| 8 | -1.881578 | 0.906017  | 0.208163  |
| 8 | -3.502679 | 0.266329  | 1.643462  |
| 6 | -4.424474 | 1.203927  | 1.034235  |
| 1 | -3.999720 | 2.206469  | 1.121773  |

|    |           |           |           |
|----|-----------|-----------|-----------|
| 1  | -4.516976 | 0.952669  | -0.024572 |
| 6  | -5.739959 | 1.078315  | 1.764921  |
| 1  | -5.624941 | 1.321001  | 2.825107  |
| 1  | -6.461831 | 1.775102  | 1.328700  |
| 1  | -6.143072 | 0.065475  | 1.676420  |
| 1  | -2.004295 | -1.174477 | 2.591384  |
| 16 | 0.283653  | -2.487883 | 2.498807  |

Compound: S<sub>1</sub>/S<sub>0</sub> conical intersection (CI) of *s-E-1* along  $\tau$ -torsion relaxation in gas phase

Method/basis set: CASSCF(6,6)/4-31G

Energy of the optimized structure: -1376.2376534321 Hartree

# of imaginary frequencies: 0

Cartesian coordinate of the optimized structure:

|   |           |           |           |
|---|-----------|-----------|-----------|
| 6 | 0.959780  | 1.715652  | 3.355341  |
| 6 | 0.291589  | 2.096304  | 2.135441  |
| 6 | 0.653049  | 1.562899  | 0.966818  |
| 6 | 1.710567  | 0.537030  | 0.903741  |
| 6 | 2.443553  | 0.272838  | 2.146378  |
| 6 | 2.012509  | 0.880145  | 3.354452  |
| 1 | 0.620524  | 2.159418  | 4.269111  |
| 1 | -0.498098 | 2.810534  | 2.183778  |
| 1 | 3.442716  | -0.091961 | 2.086278  |
| 1 | 2.540838  | 0.655414  | 4.257330  |
| 7 | 0.103029  | 1.929996  | -0.281412 |
| 6 | 1.821927  | -0.310578 | -0.173415 |
| 1 | 1.119588  | -0.253810 | -0.978700 |
| 6 | 2.690187  | -1.494634 | -0.057751 |
| 7 | 3.727096  | -1.892036 | -0.856249 |
| 6 | 2.694433  | -2.196012 | 1.112316  |
| 7 | 3.790234  | -3.045707 | 1.019587  |
| 6 | 4.340457  | -2.850311 | -0.203718 |
| 8 | 2.036707  | -1.870652 | 2.178396  |
| 1 | 4.058952  | -3.717023 | 1.694710  |
| 1 | 5.145739  | -3.431318 | -0.582529 |
| 6 | -1.150740 | 2.239141  | -0.590533 |
| 1 | 0.761847  | 1.957556  | -1.035314 |
| 7 | -1.386569 | 2.572637  | -1.907678 |

|    |           |          |           |
|----|-----------|----------|-----------|
| 6  | -0.520137 | 2.601107 | -2.958832 |
| 8  | 0.668002  | 2.329837 | -2.900465 |
| 8  | -1.142819 | 2.965775 | -4.069147 |
| 6  | -0.409132 | 3.057052 | -5.332912 |
| 1  | 0.385353  | 3.773502 | -5.203389 |
| 1  | 0.021701  | 2.090499 | -5.536295 |
| 6  | -1.413212 | 3.480526 | -6.376267 |
| 1  | -1.846049 | 4.437811 | -6.123541 |
| 1  | -0.926249 | 3.565999 | -7.339458 |
| 1  | -2.209379 | 2.754451 | -6.456771 |
| 1  | -2.332123 | 2.805555 | -2.108223 |
| 16 | -2.543533 | 2.230268 | 0.450255  |

Compound: S<sub>1</sub>/S<sub>0</sub> conical intersection (CI) of *s*-Z-1 along τ-torsion relaxation in gas phase

Method/basis set: CASSCF(6,6)/4-31G

Energy of the optimized structure: -1376.2477234233 Hartree

# of imaginary frequencies: 0

Cartesian coordinate of the optimized structure:

|   |           |           |           |
|---|-----------|-----------|-----------|
| 6 | 4.437997  | -3.438204 | -0.941259 |
| 6 | 3.104236  | -3.694870 | -0.971818 |
| 6 | 2.170520  | -2.646537 | -0.830084 |
| 6 | 2.684657  | -1.292160 | -0.695408 |
| 6 | 4.113804  | -1.102658 | -0.636389 |
| 6 | 4.966636  | -2.132690 | -0.754477 |
| 1 | 5.119551  | -4.255882 | -1.064432 |
| 1 | 2.750891  | -4.690835 | -1.093835 |
| 1 | 4.471206  | -0.100240 | -0.514584 |
| 1 | 6.025660  | -1.988013 | -0.722752 |
| 7 | 0.836087  | -2.811876 | -0.844955 |
| 6 | 1.862648  | -0.196926 | -0.609749 |
| 1 | 2.343382  | 0.751956  | -0.420071 |
| 6 | 0.417109  | -0.234454 | -0.821084 |
| 7 | -0.440959 | 0.108901  | 0.284409  |
| 6 | -0.134901 | 0.395340  | -2.013634 |
| 7 | -1.372235 | 0.872624  | -1.576238 |
| 6 | -1.466159 | 0.686743  | -0.210749 |
| 8 | 0.321109  | 0.526608  | -3.148542 |

|    |           |           |           |
|----|-----------|-----------|-----------|
| 1  | -2.036372 | 1.304473  | -2.166910 |
| 1  | -2.315221 | 1.008960  | 0.345984  |
| 6  | 0.124953  | -3.906448 | -0.512329 |
| 1  | 0.341291  | -1.771065 | -0.965223 |
| 7  | -1.179273 | -3.929425 | -0.911637 |
| 6  | -1.837382 | -3.192030 | -1.864221 |
| 8  | -1.371029 | -2.332800 | -2.570922 |
| 8  | -3.107933 | -3.599864 | -1.919368 |
| 6  | -4.023426 | -2.987070 | -2.874716 |
| 1  | -4.051114 | -1.927438 | -2.678466 |
| 1  | -3.628886 | -3.144207 | -3.865559 |
| 6  | -5.362940 | -3.651877 | -2.670210 |
| 1  | -5.715087 | -3.497414 | -1.660213 |
| 1  | -6.089557 | -3.235336 | -3.356540 |
| 1  | -5.291822 | -4.715352 | -2.848793 |
| 1  | -1.720066 | -4.656230 | -0.501518 |
| 16 | 0.647893  | -5.219316 | 0.460421  |
